# Supplementary material
Source: publisher figshare collection journal article supplement (https://tandf.figshare.com/articles/dataset/_/1177008)
Supplement: Supplementary file 1 [file 3]

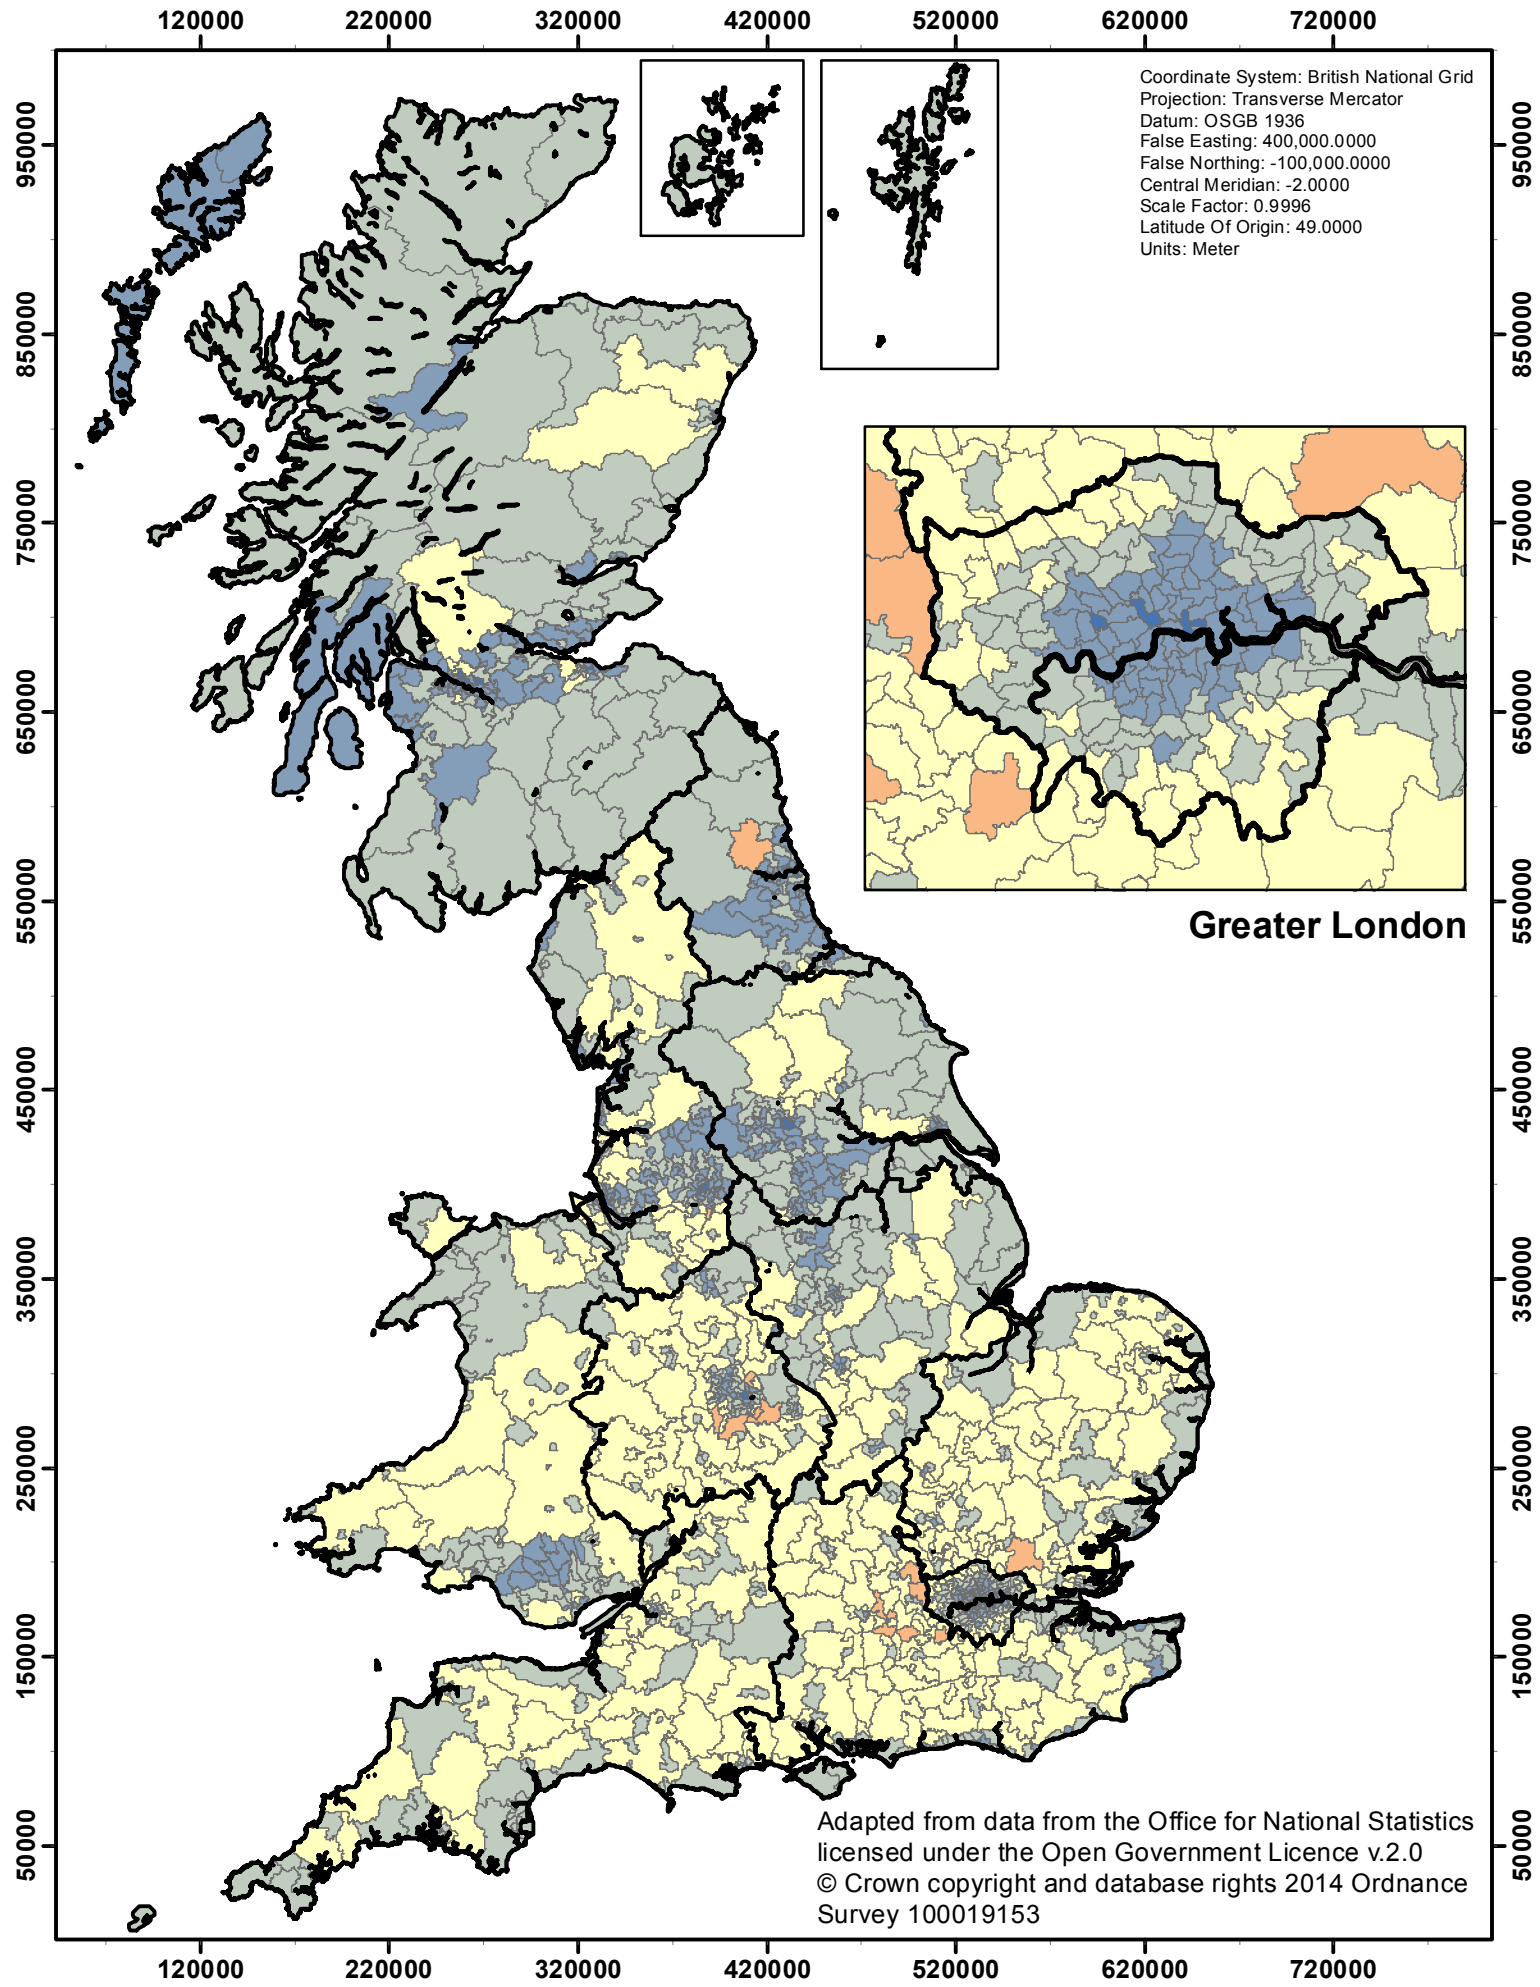

Map 1a : Geographic representation of car ownership in the 1971 census

## Mapping Car Ownership in Great Britain over Four Decades

Stephen D Clark, School of Geography, University of Leeds, UK, LS2 9JT  
 email : gysc@leeds.ac.uk tel : +44 113 3436707 © Journal of Maps, 2014

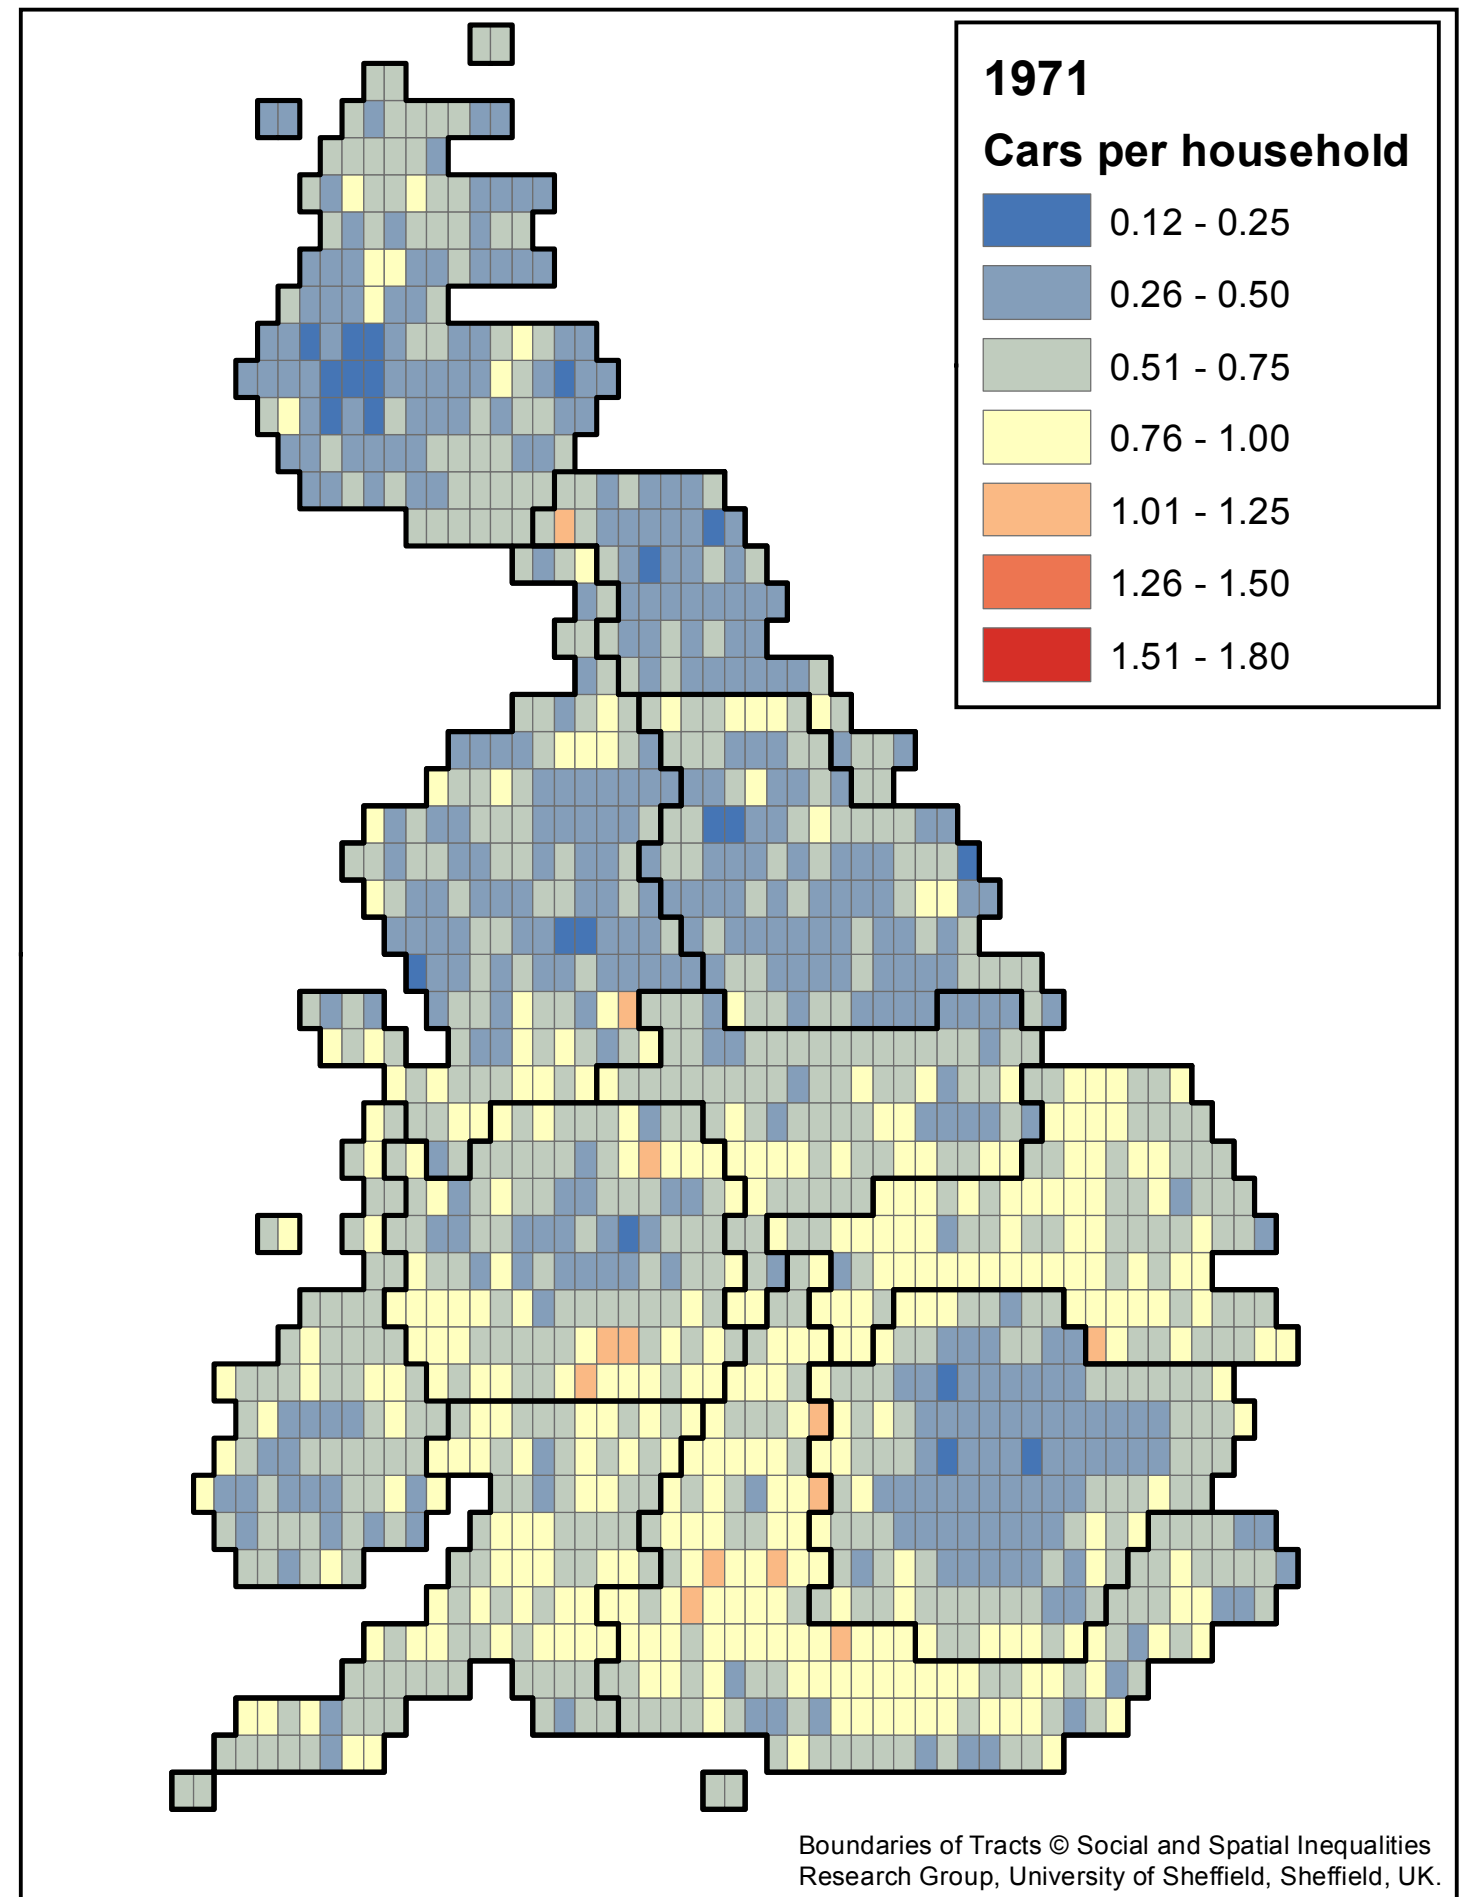

Map 1b : Cartographic representation of car ownership in the 1971 census

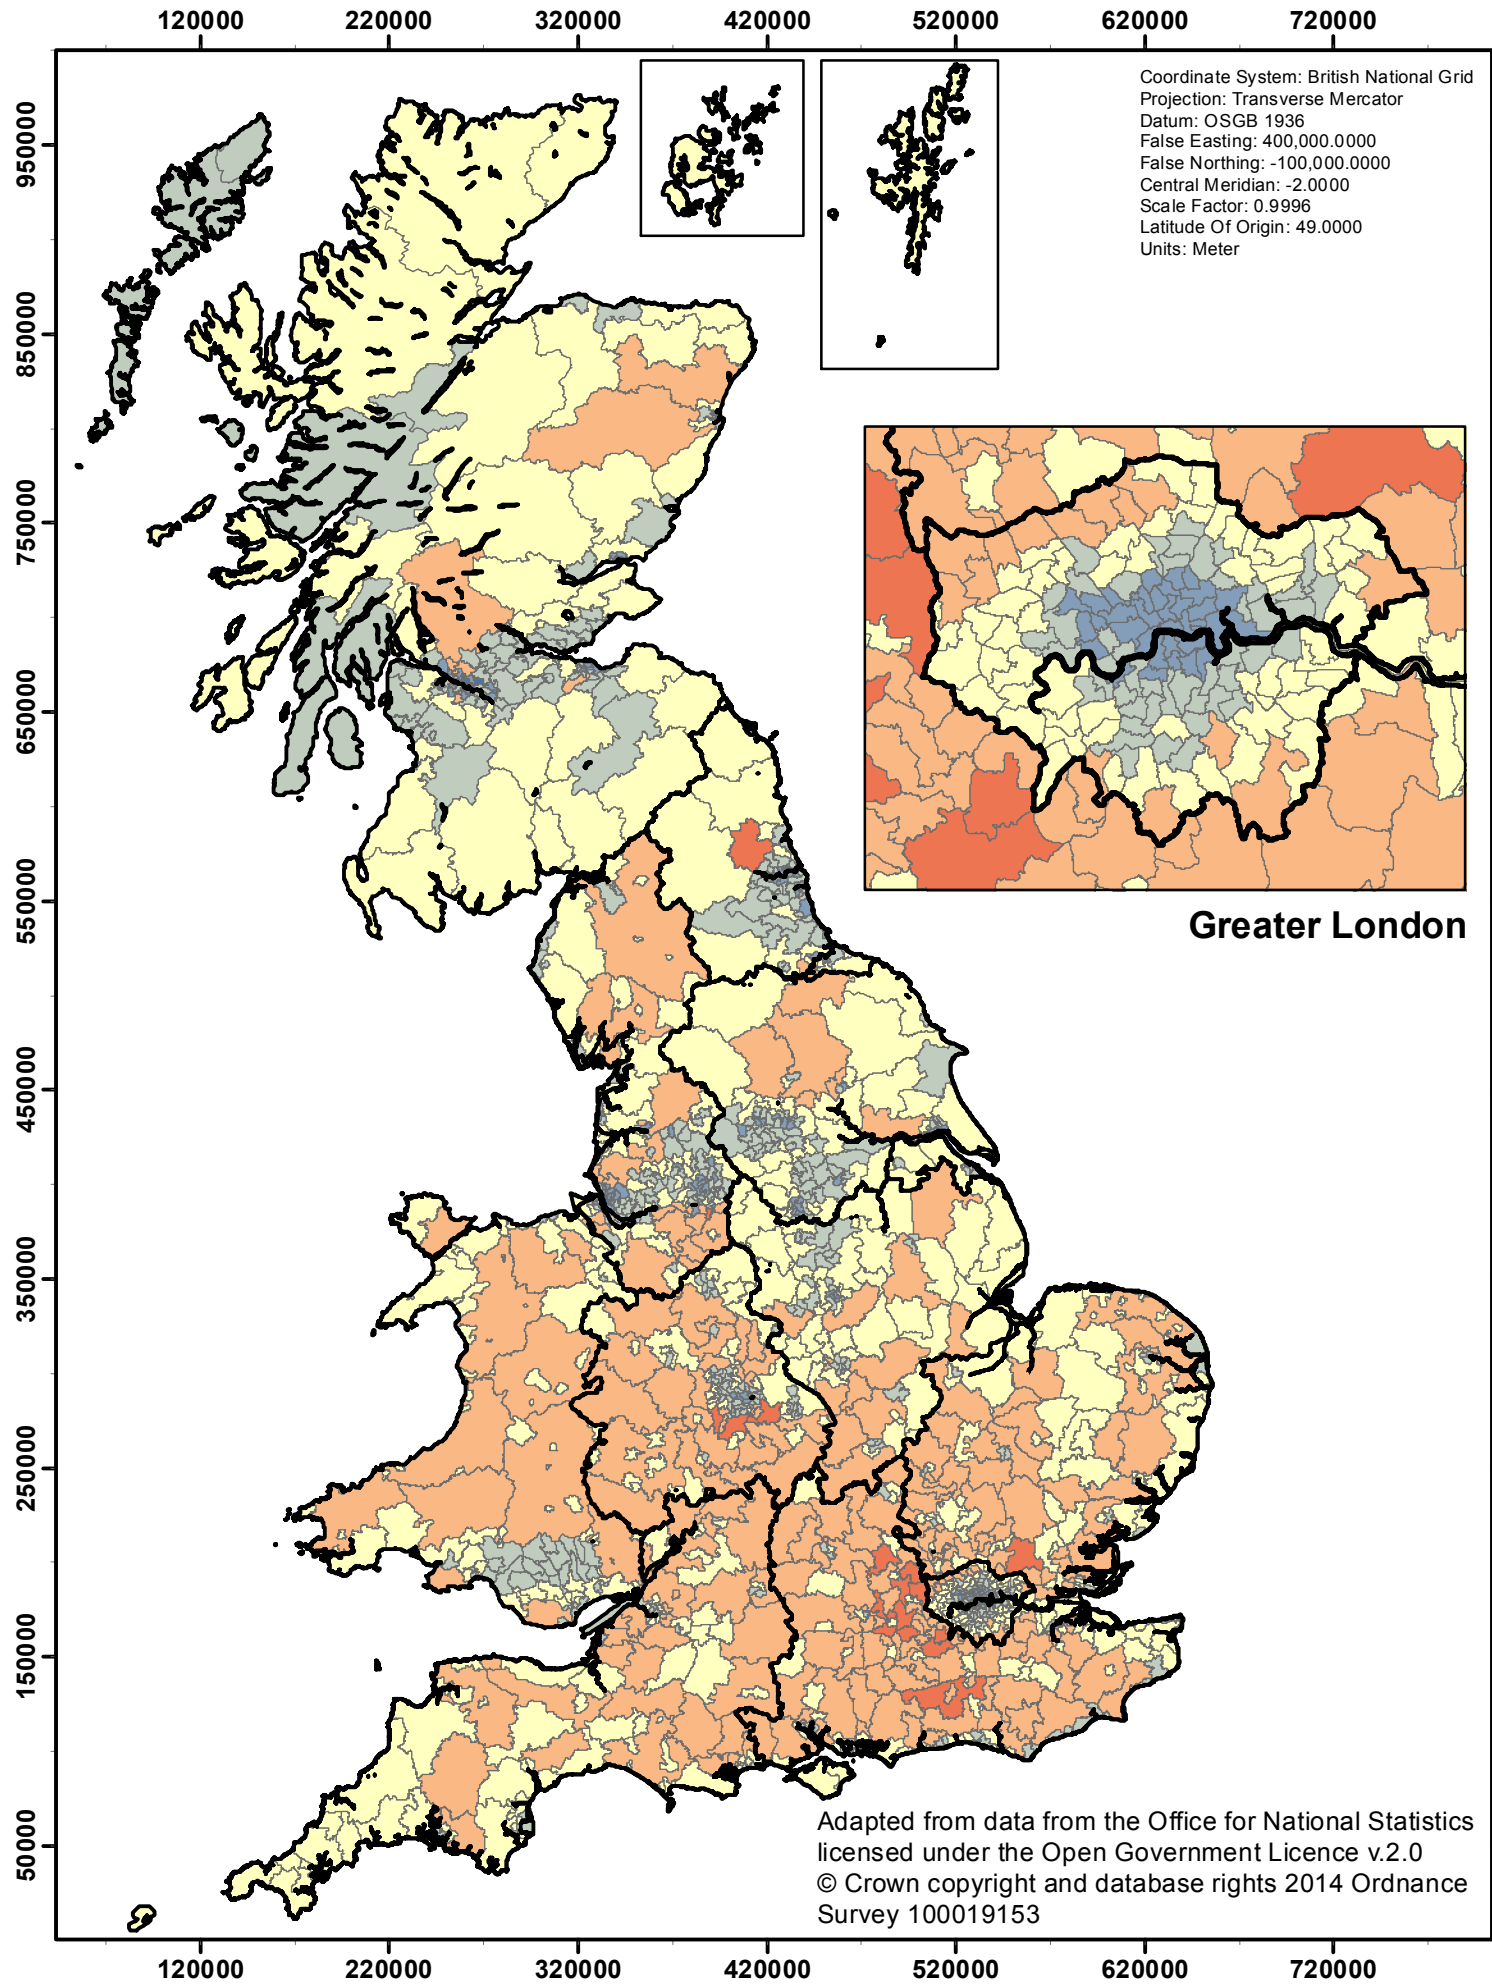

Map 2a : Geographic representation of car ownership in the 1981 census

## Mapping Car Ownership in Great Britain over Four Decades

Stephen D Clark, School of Geography, University of Leeds, UK, LS2 9JT  
 email : gysc@leeds.ac.uk tel : +44 113 3436707 © Journal of Maps, 2014

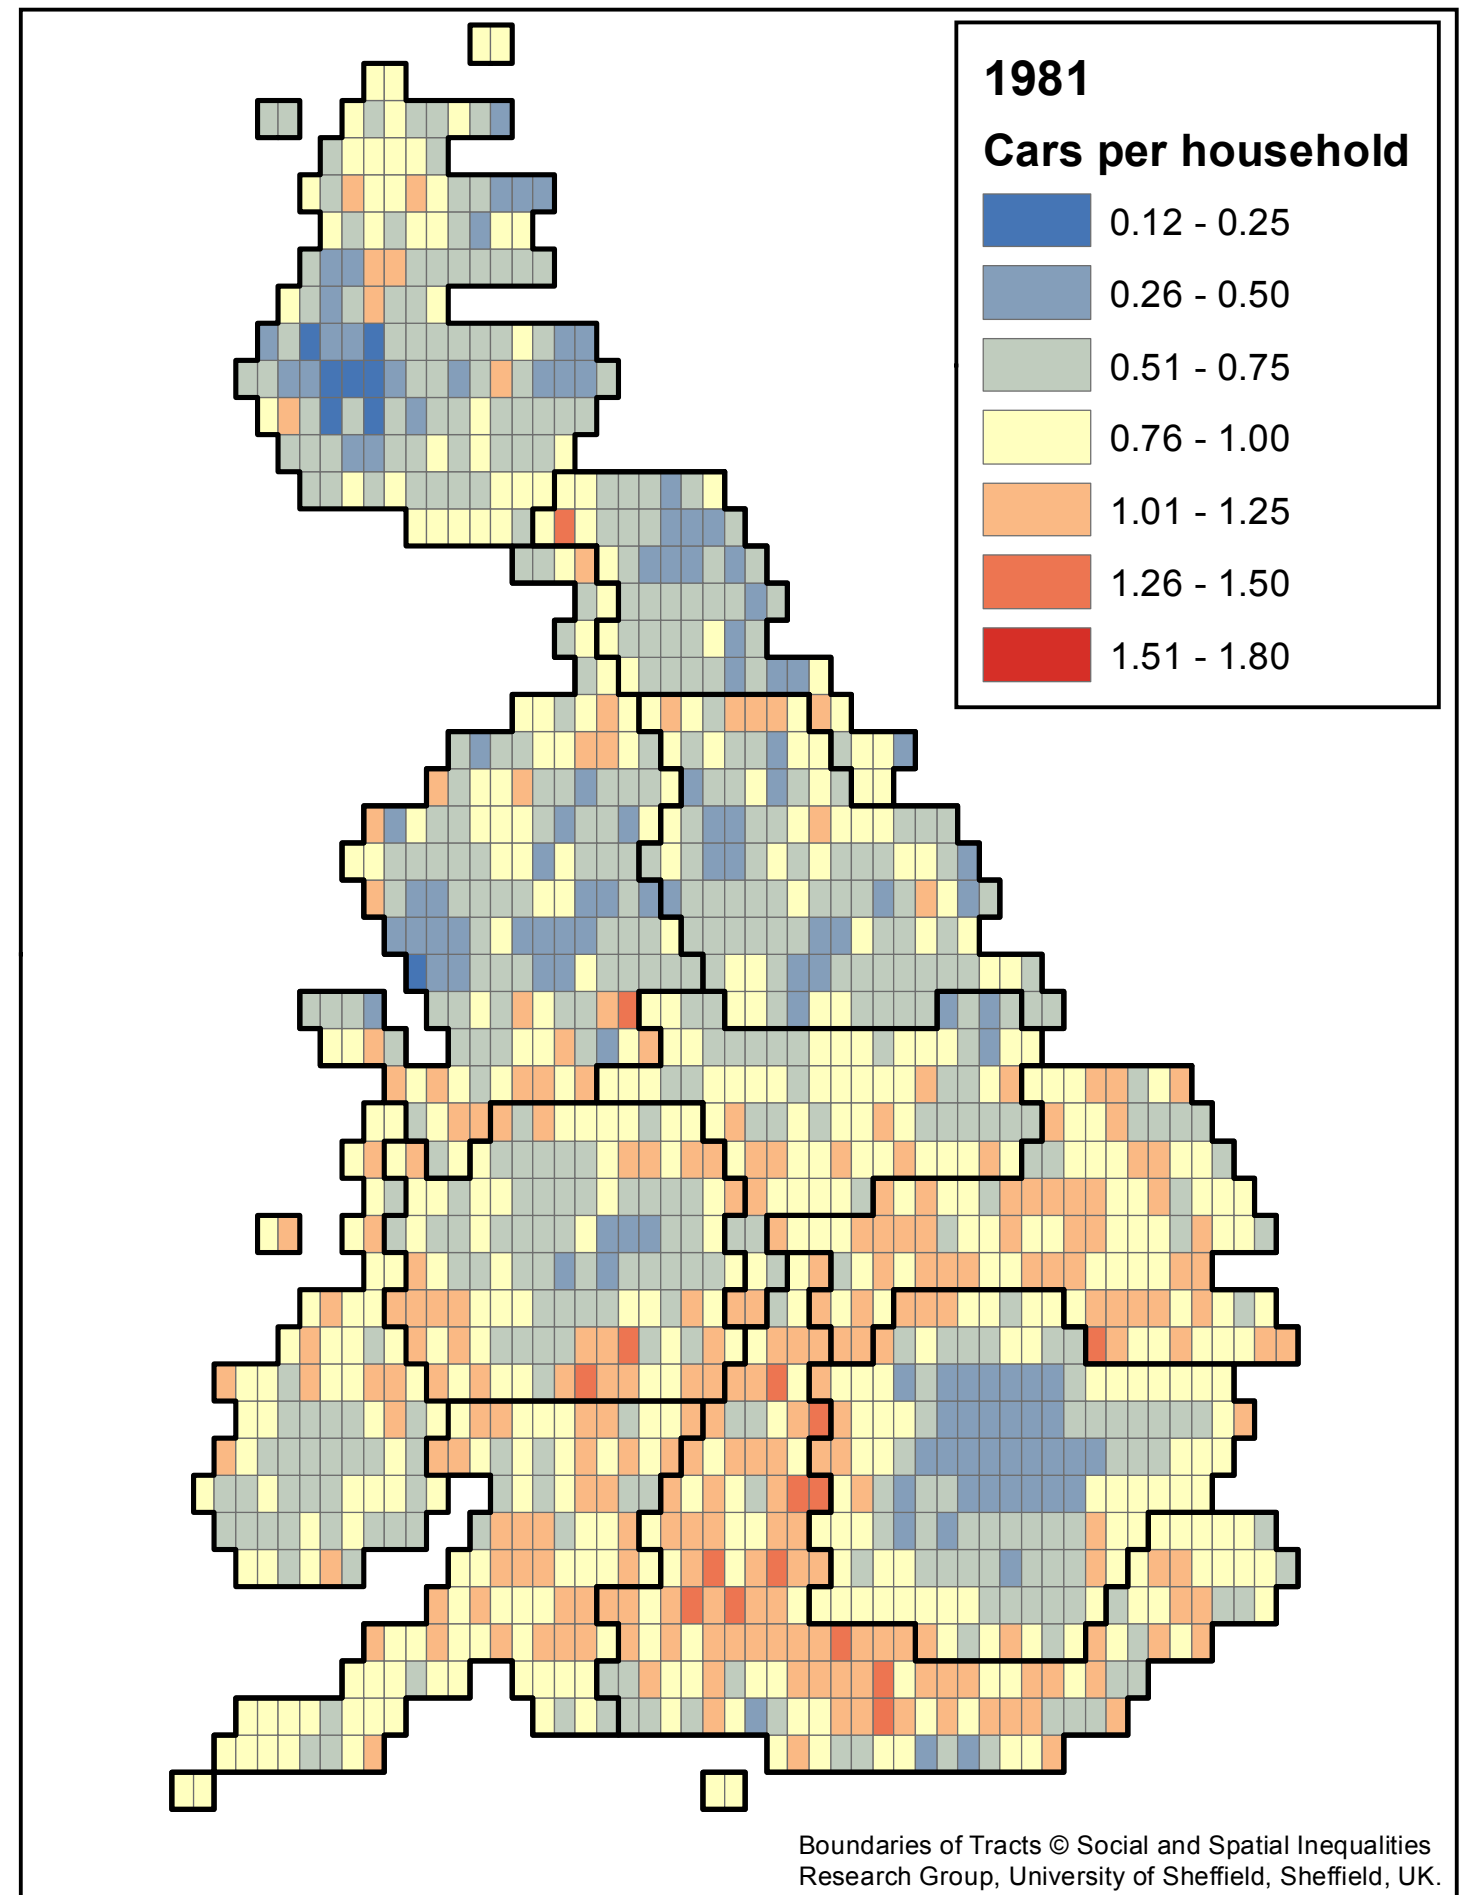

Map 2b : Cartographic representation of car ownership in the 1981 census

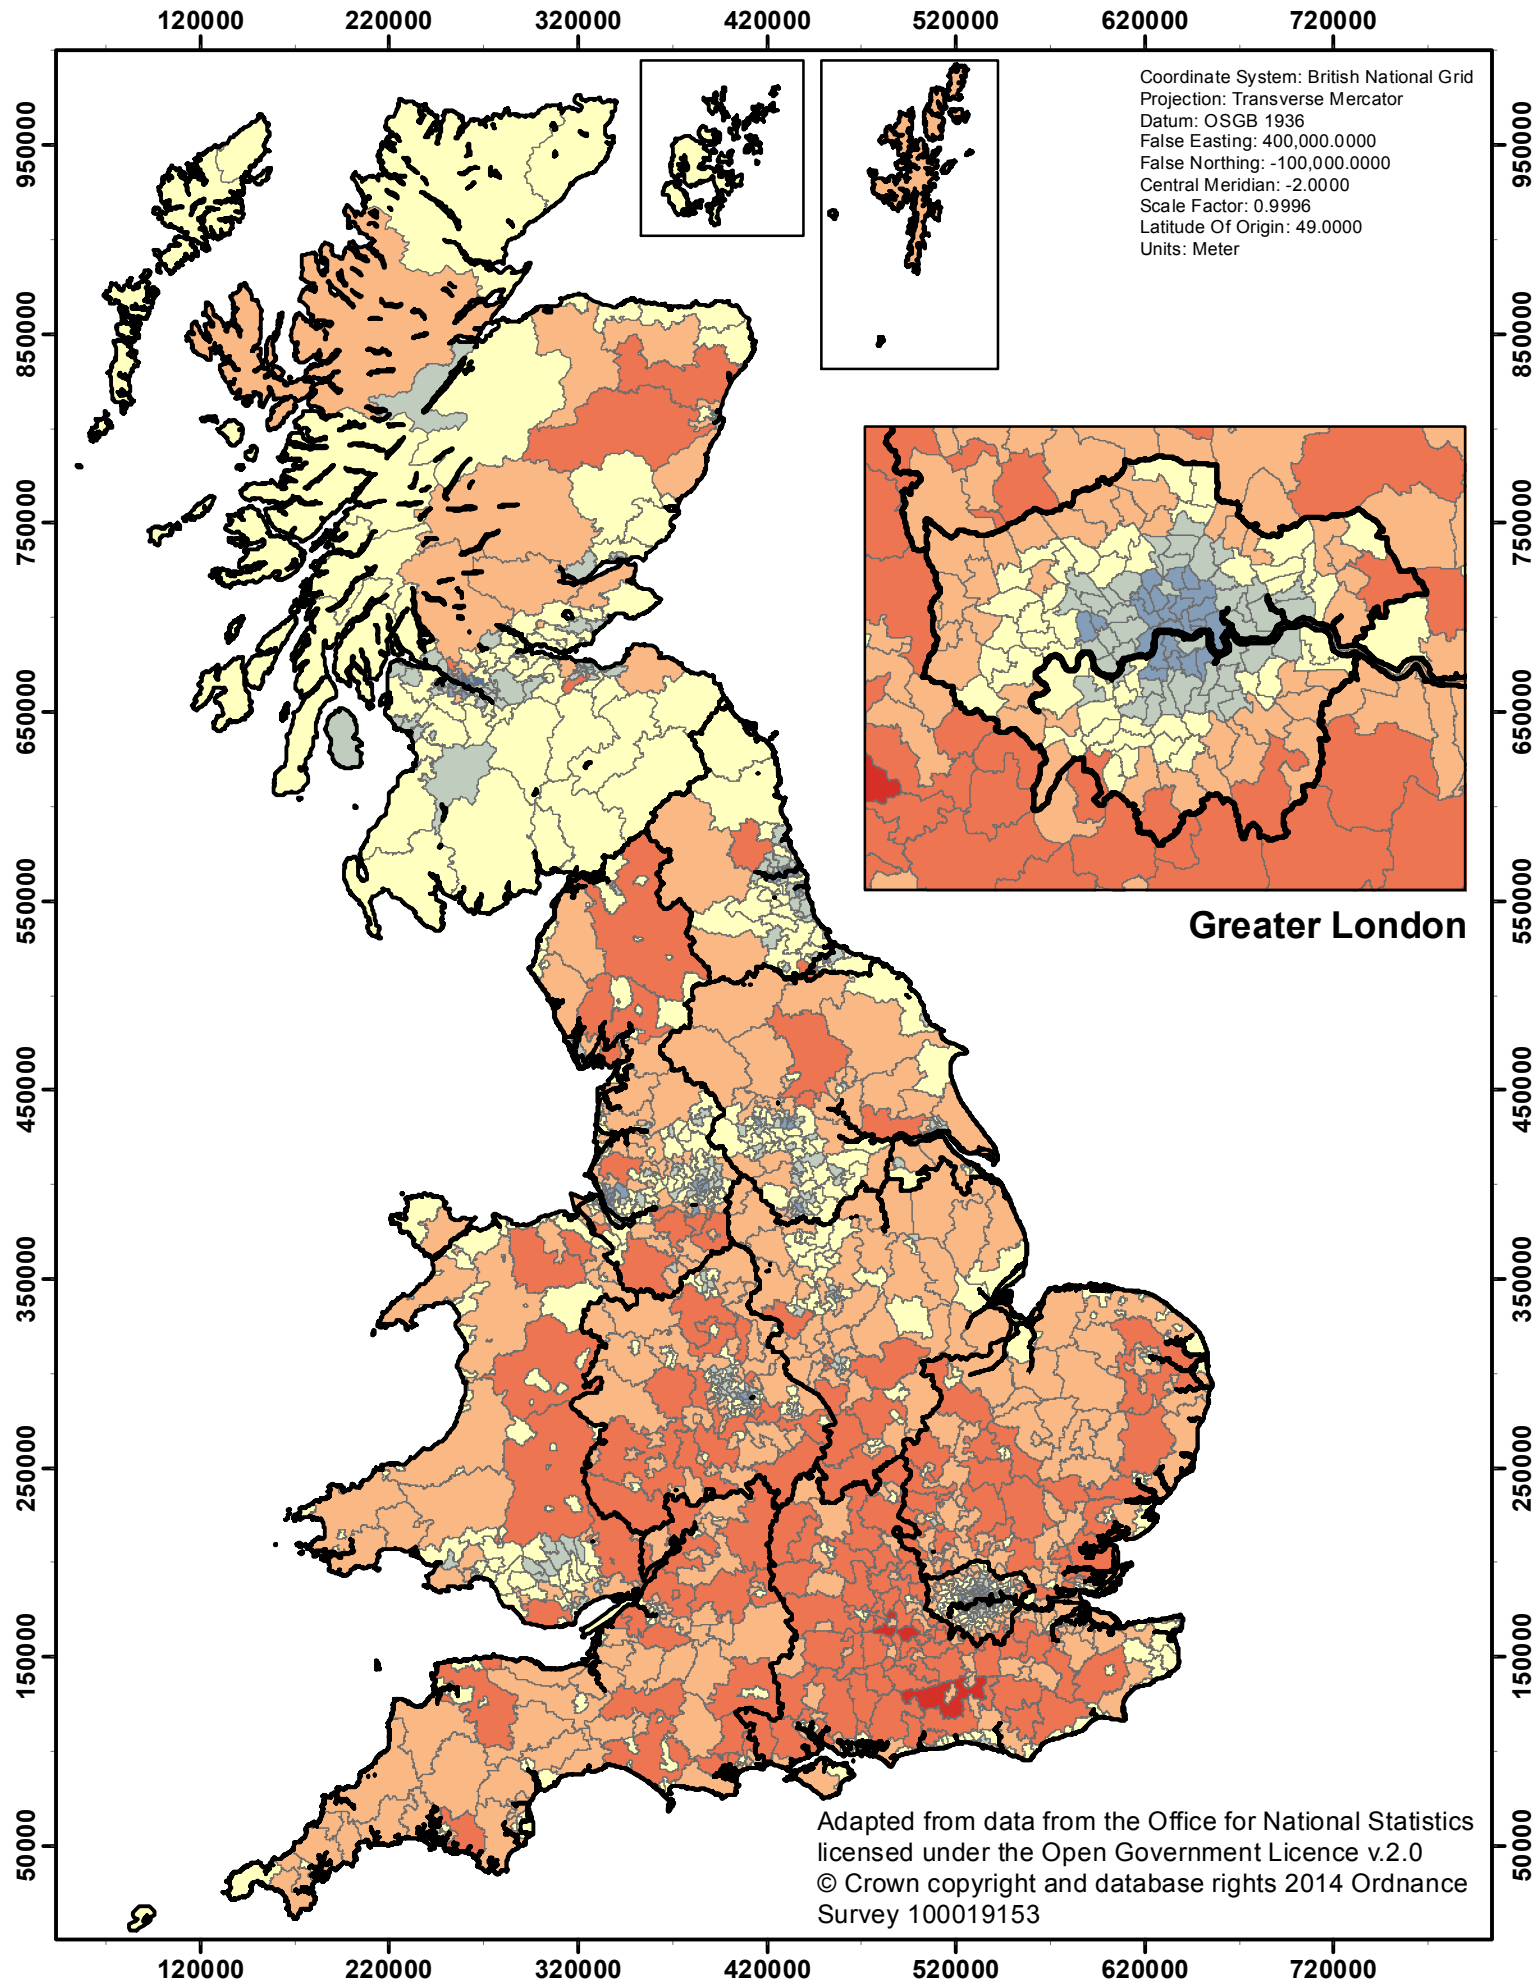

Map 3a : Geographic representation of car ownership in the 1991 census

## Mapping Car Ownership in Great Britain over Four Decades

Stephen D Clark, School of Geography, University of Leeds, UK, LS2 9JT  
 email : gysc@leeds.ac.uk tel : +44 113 3436707 © Journal of Maps, 2014

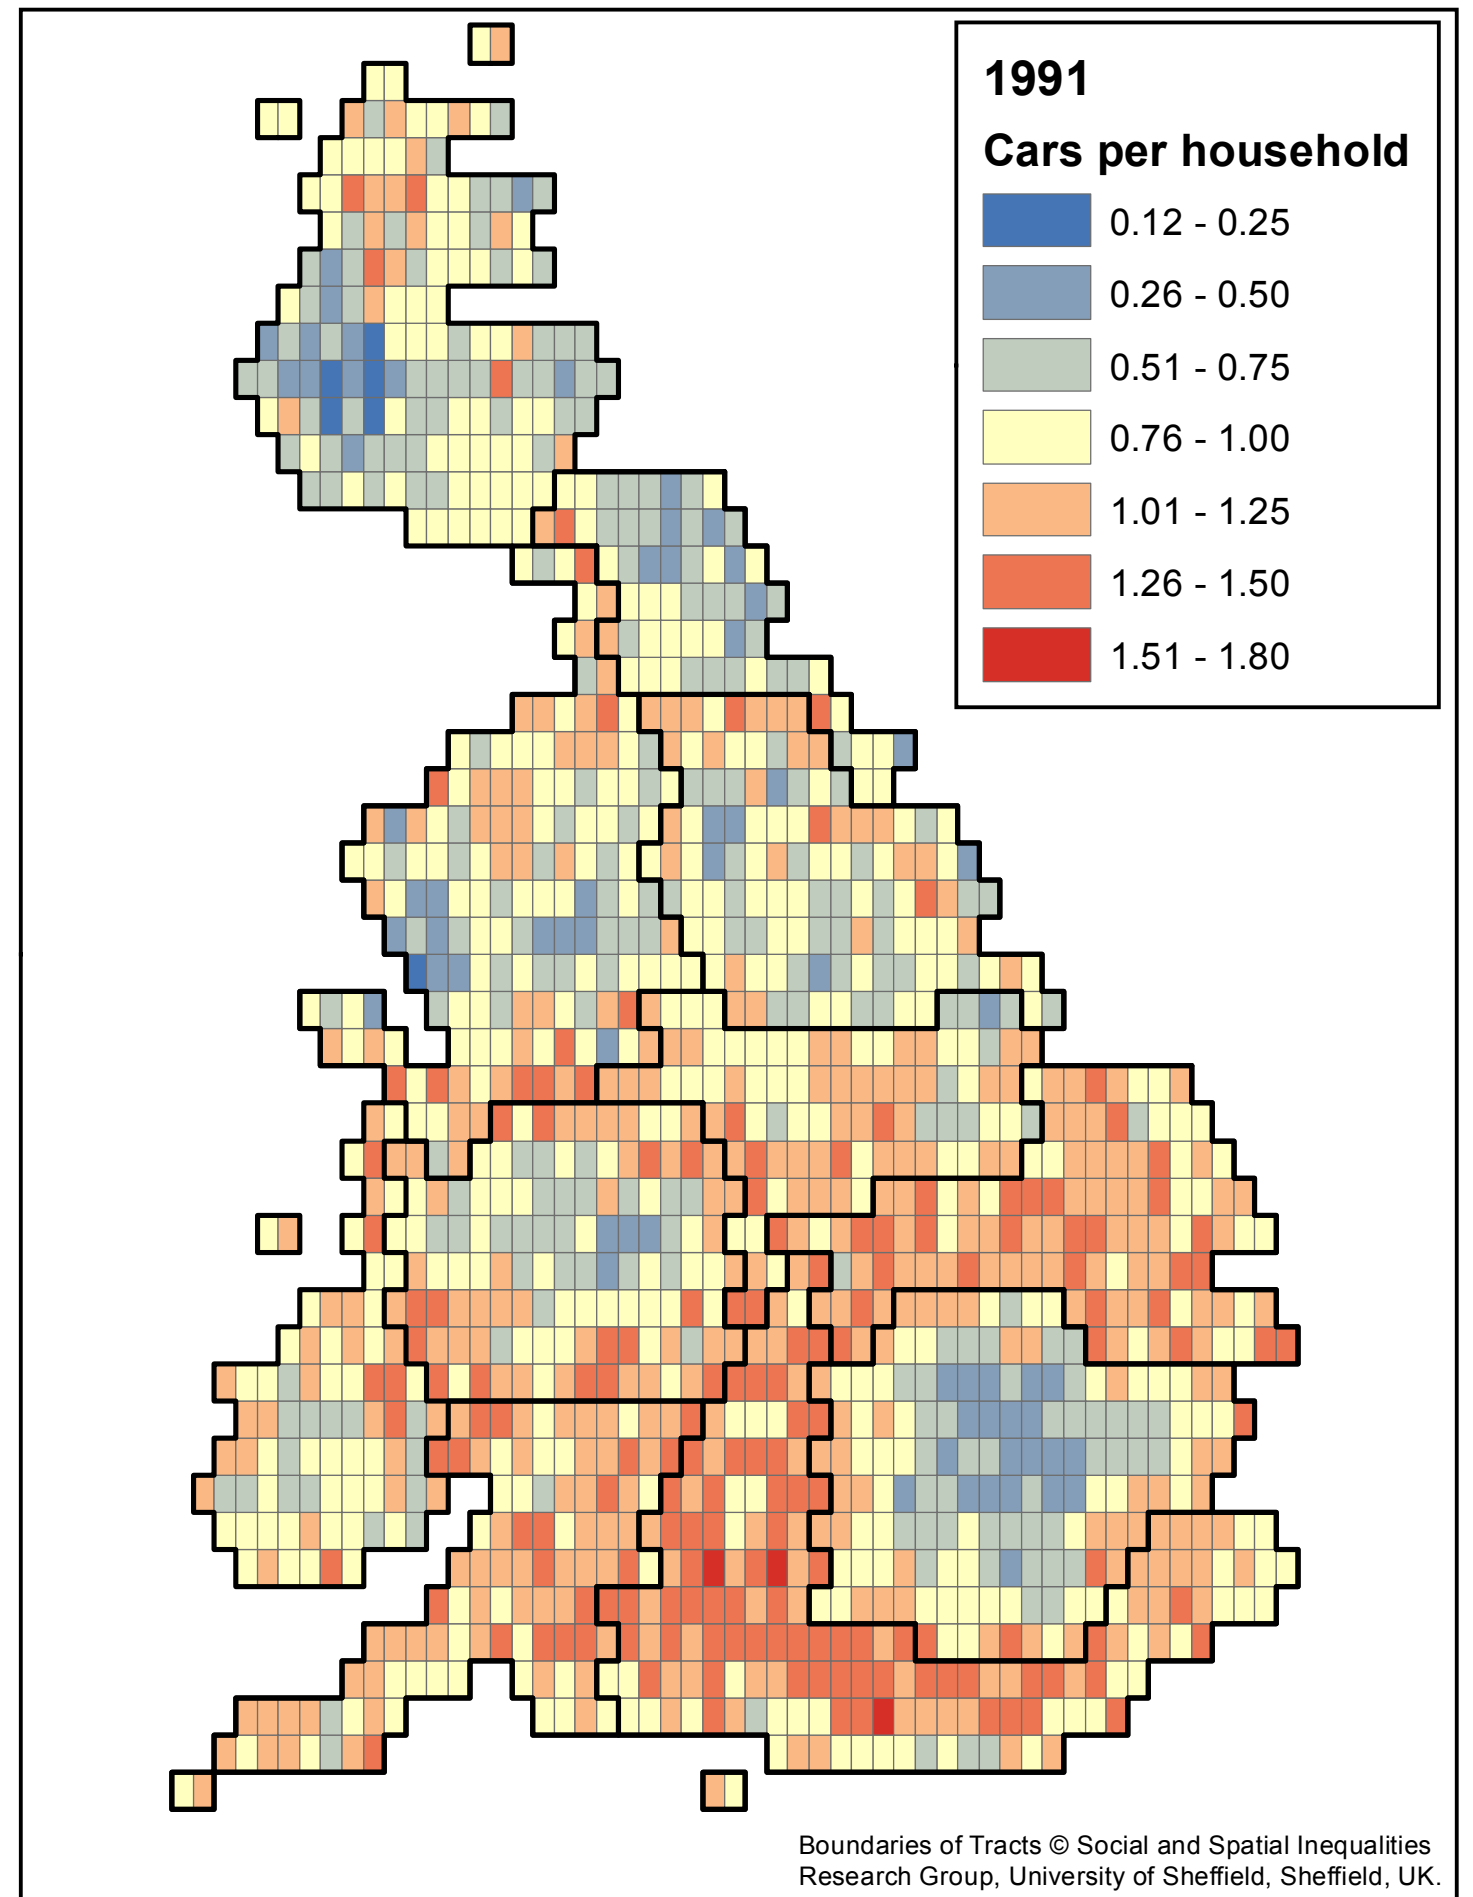

Map 3b : Cartographic representation of car ownership in the 1991 census



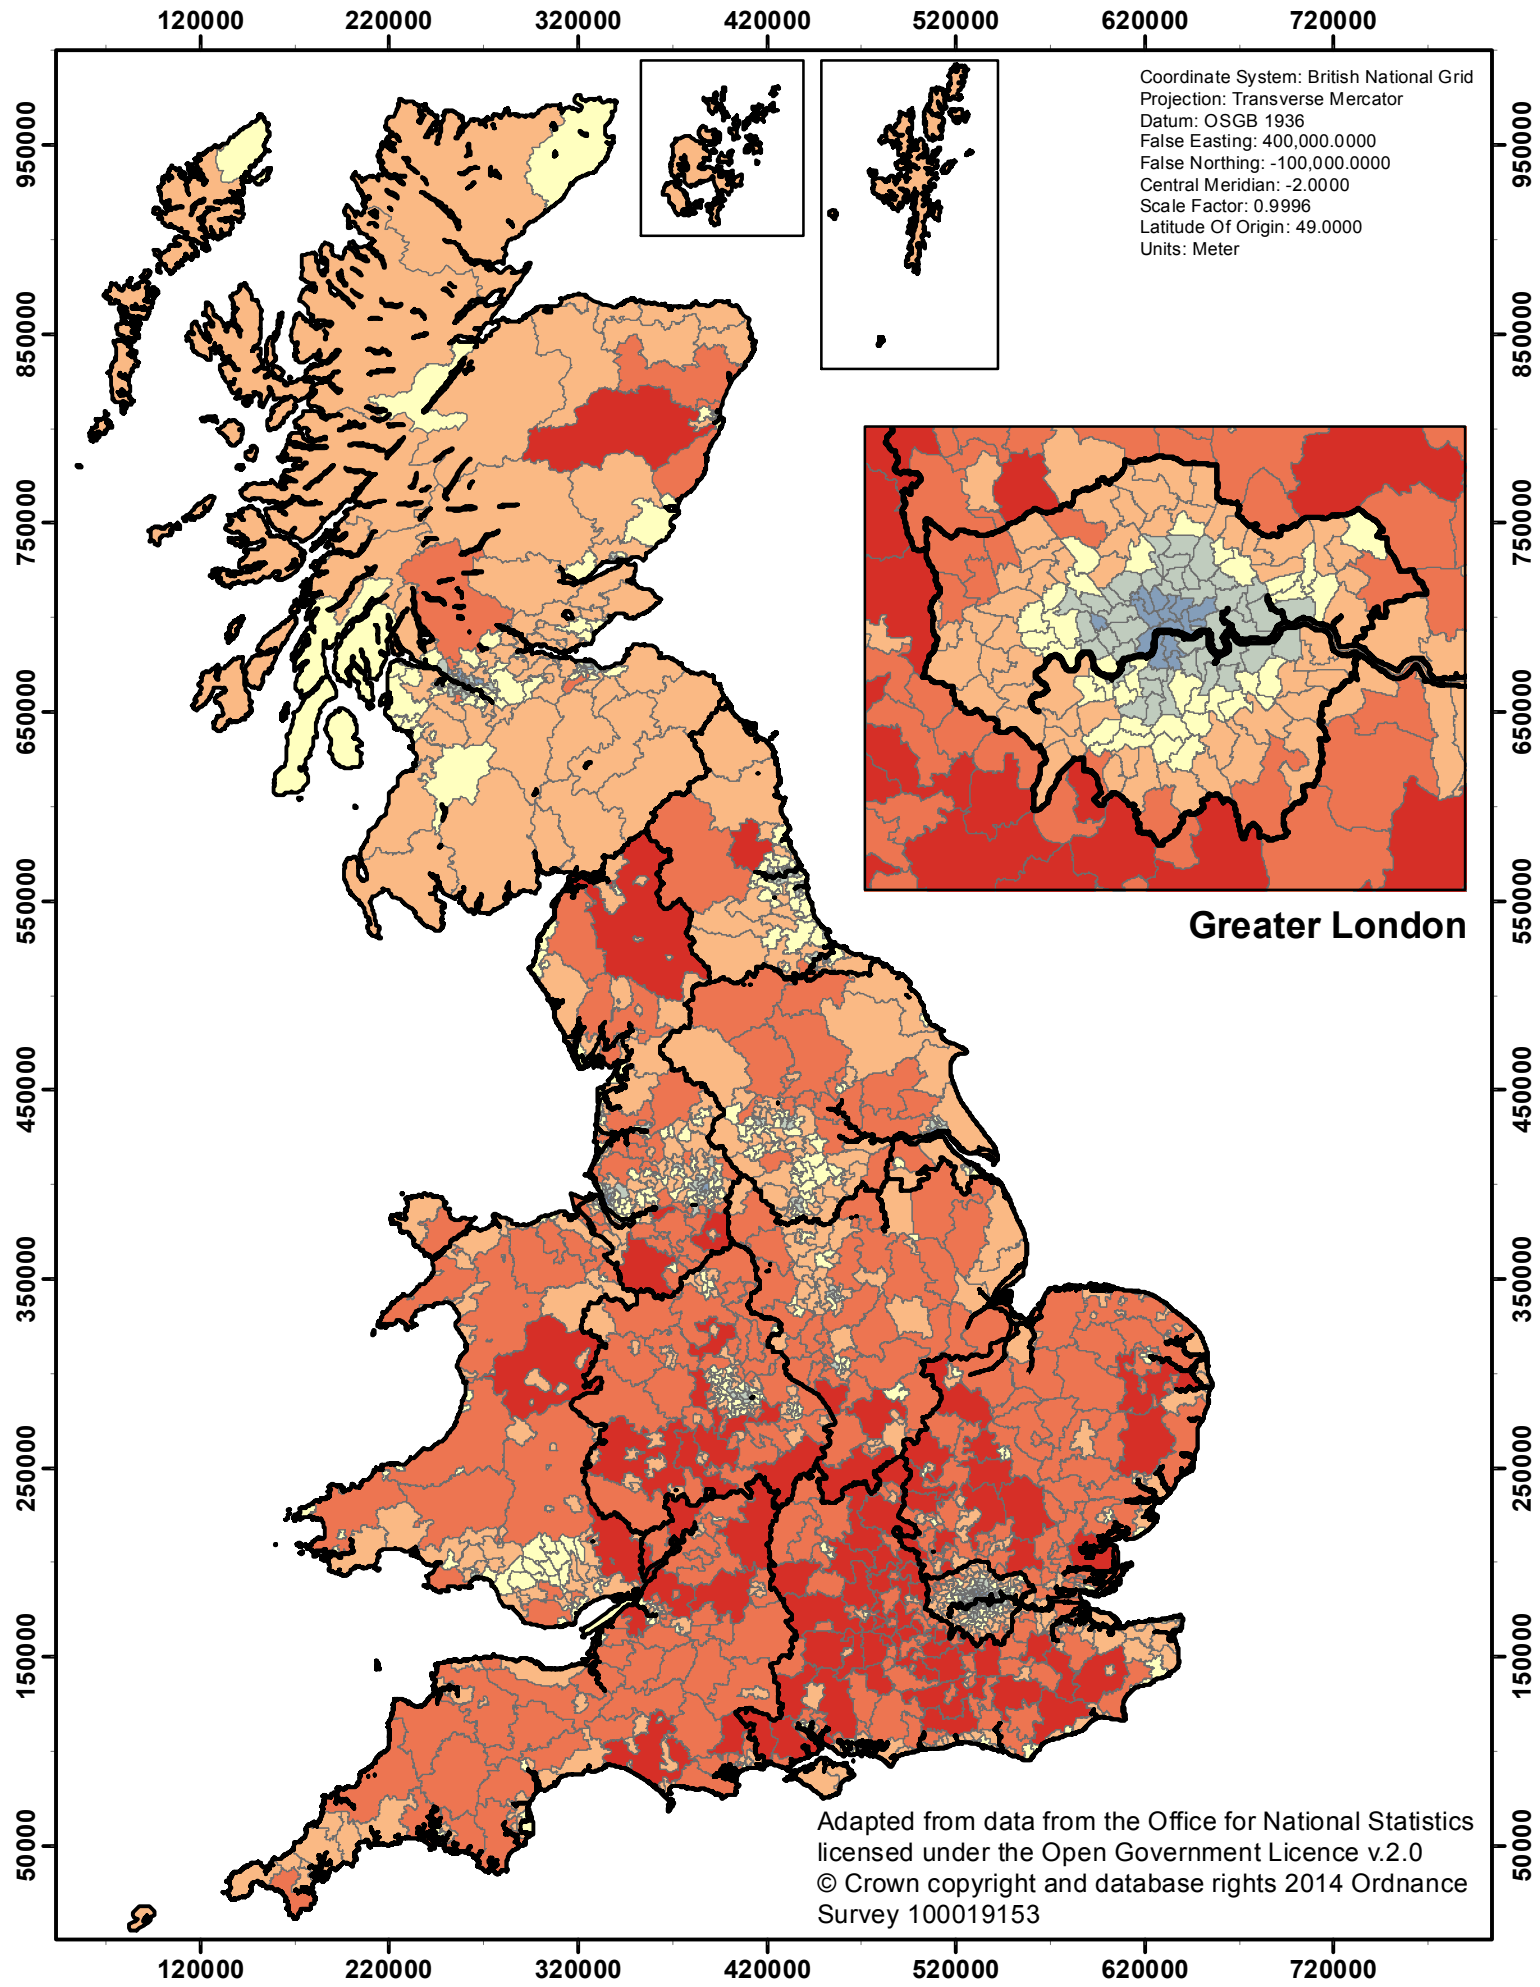

Map 4a : Geographic representation of  
 car ownership in the 2001 census

### Mapping Car Ownership in Great Britain over Four Decades

Stephen D Clark, School of Geography, University of Leeds, UK, LS2 9JT  
 email : gysc@leeds.ac.uk tel : +44 113 3436707 © Journal of Maps, 2014

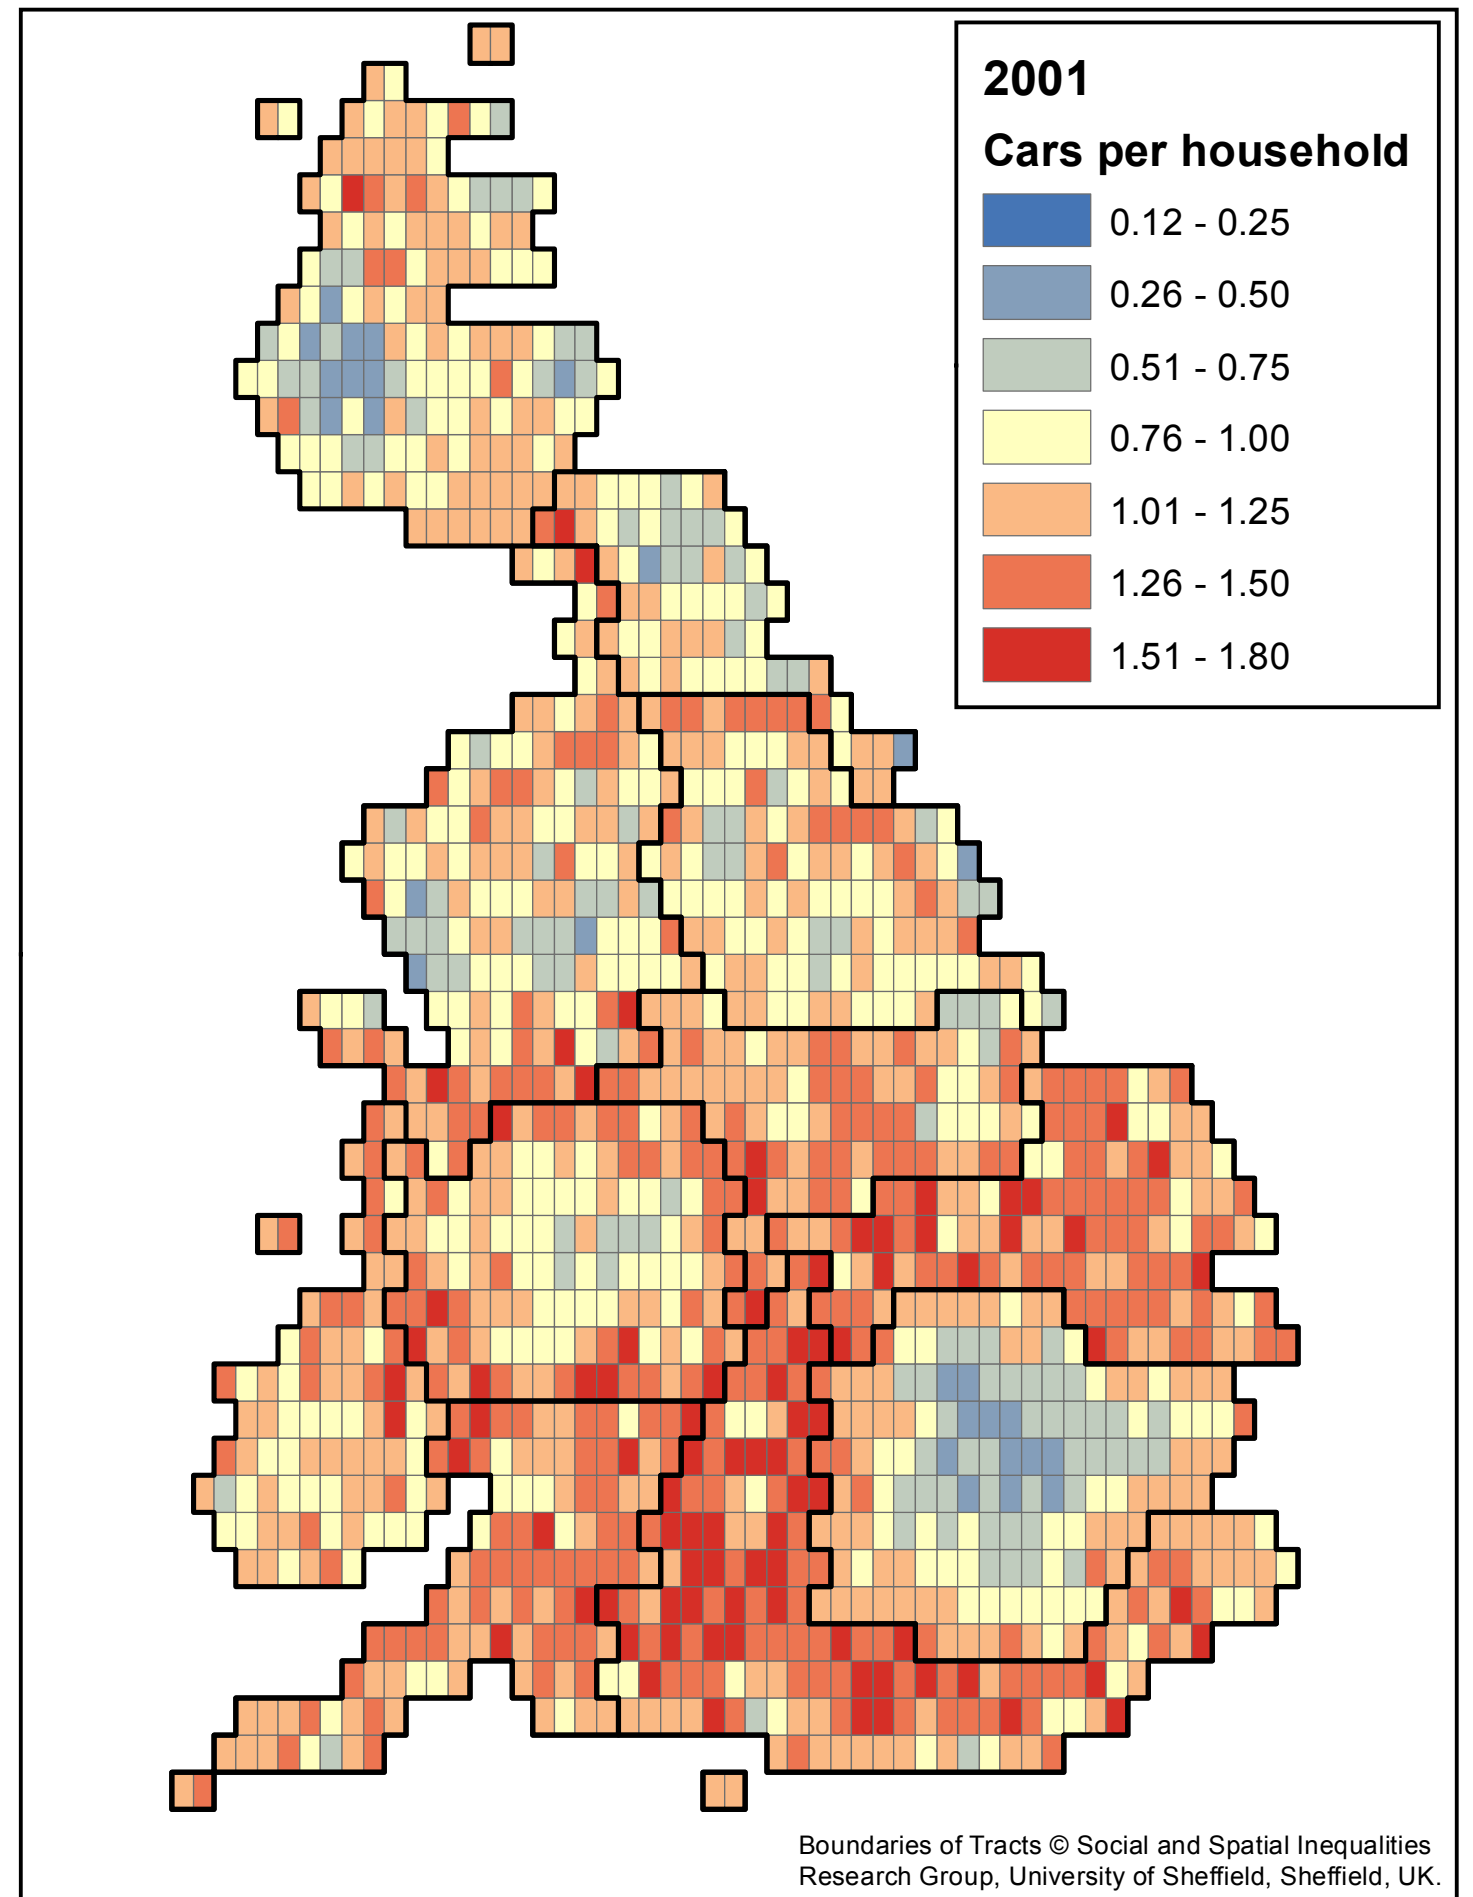

Map 4b : Cartographic representation of  
 car ownership in the 2001 census

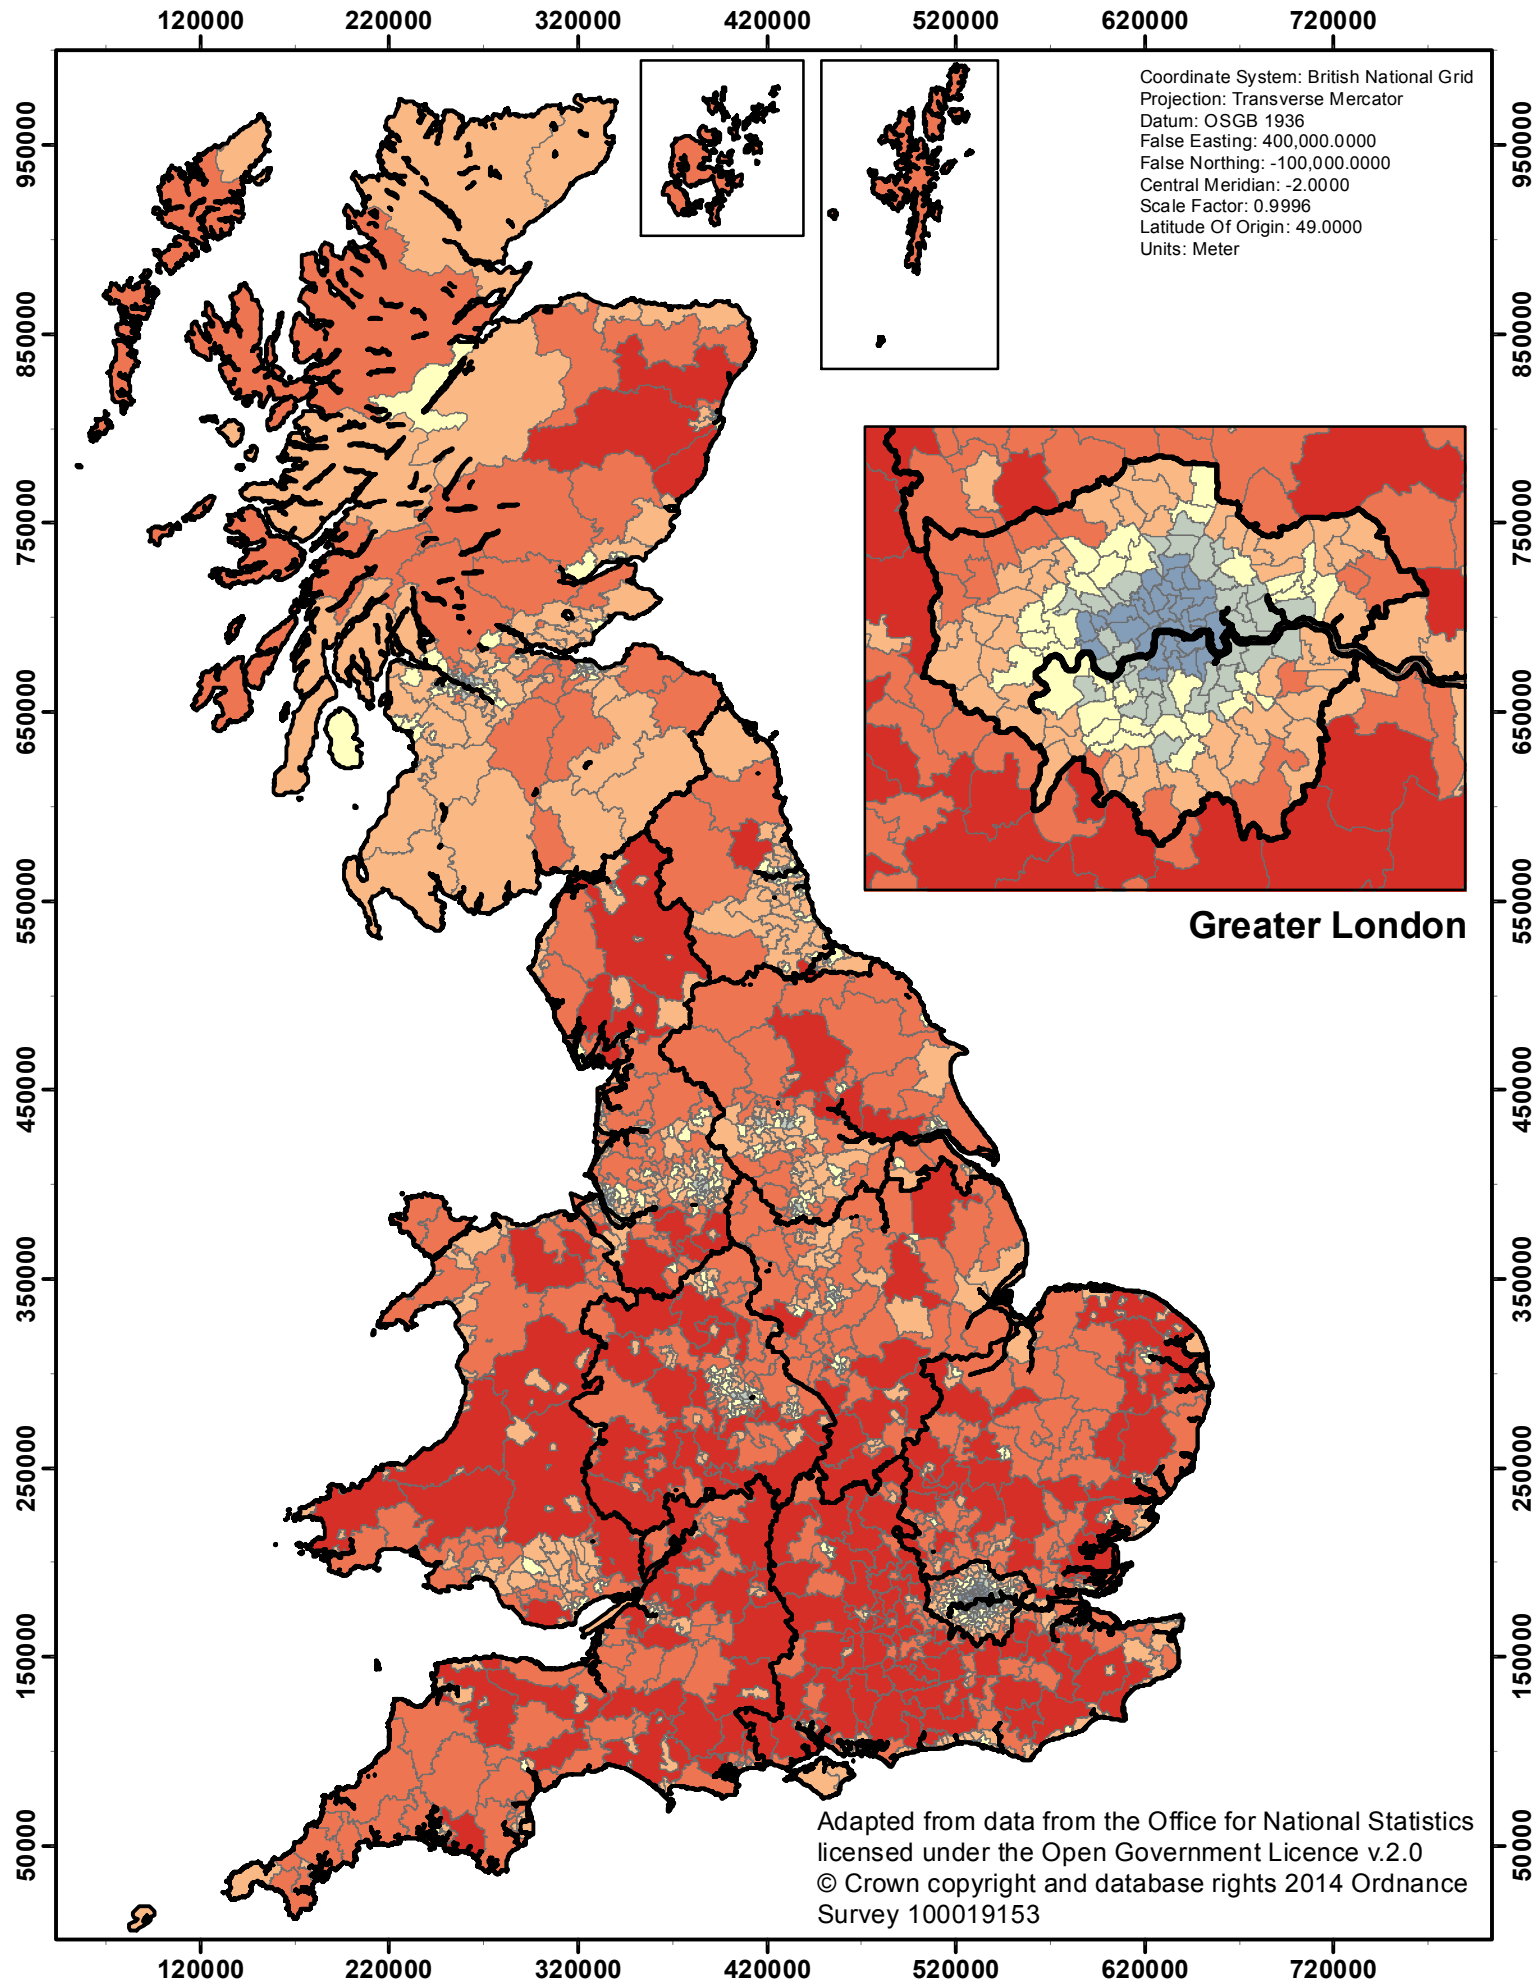

Map 5a : Geographic representation of car ownership in the 2011 census

### Mapping Car Ownership in Great Britain over Four Decades

Stephen D Clark, School of Geography, University of Leeds, UK, LS2 9JT  
 email : gysc@leeds.ac.uk tel : +44 113 3436707 © Journal of Maps, 2014

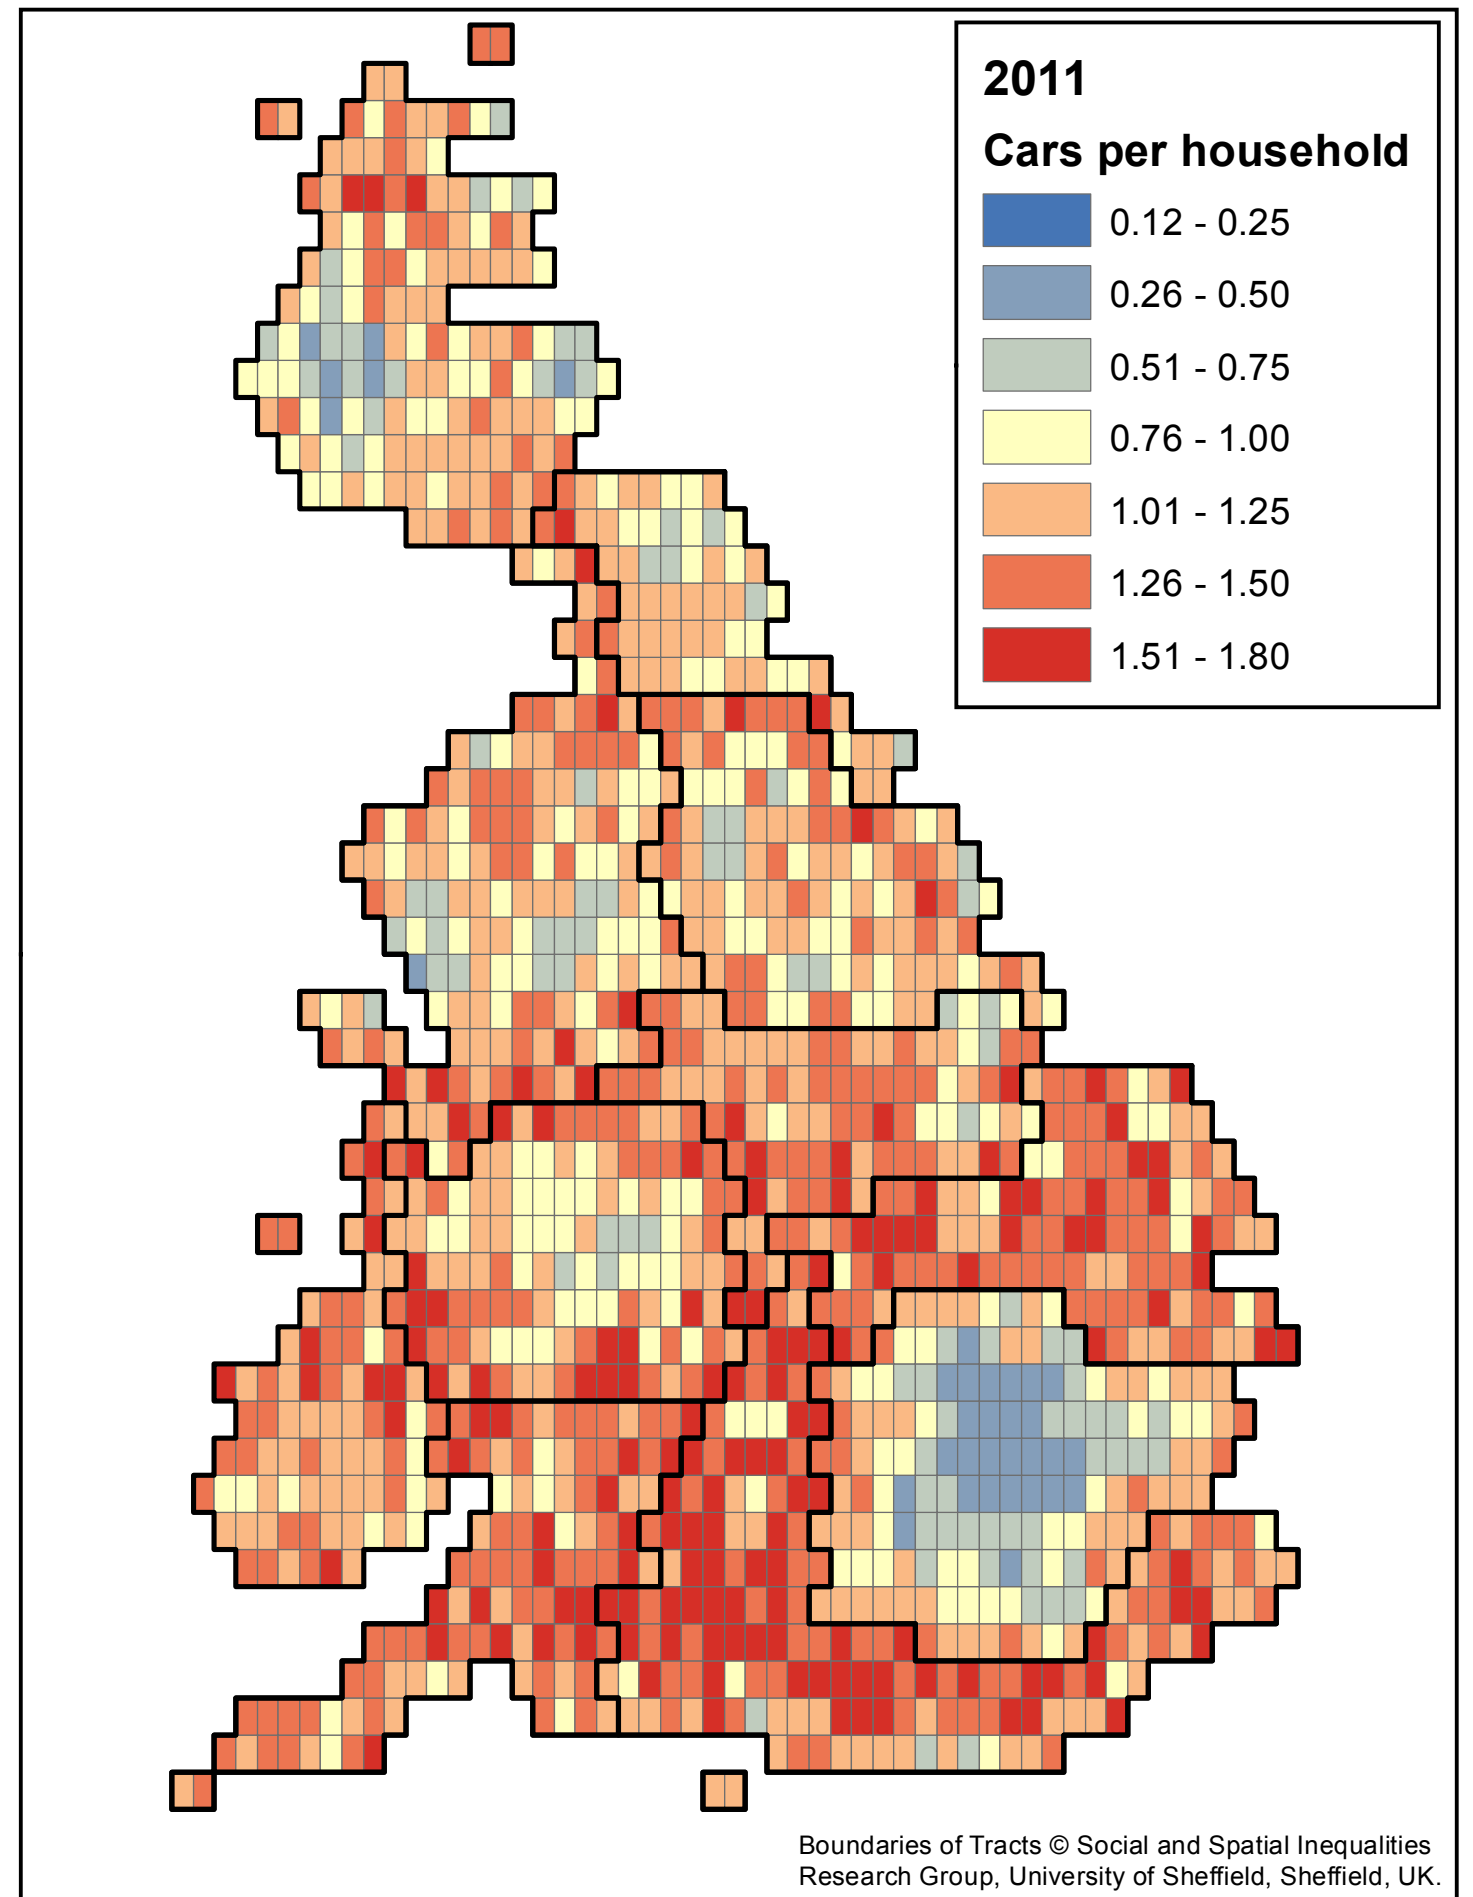

Map 5b : Cartographic representation of car ownership in the 2011 census

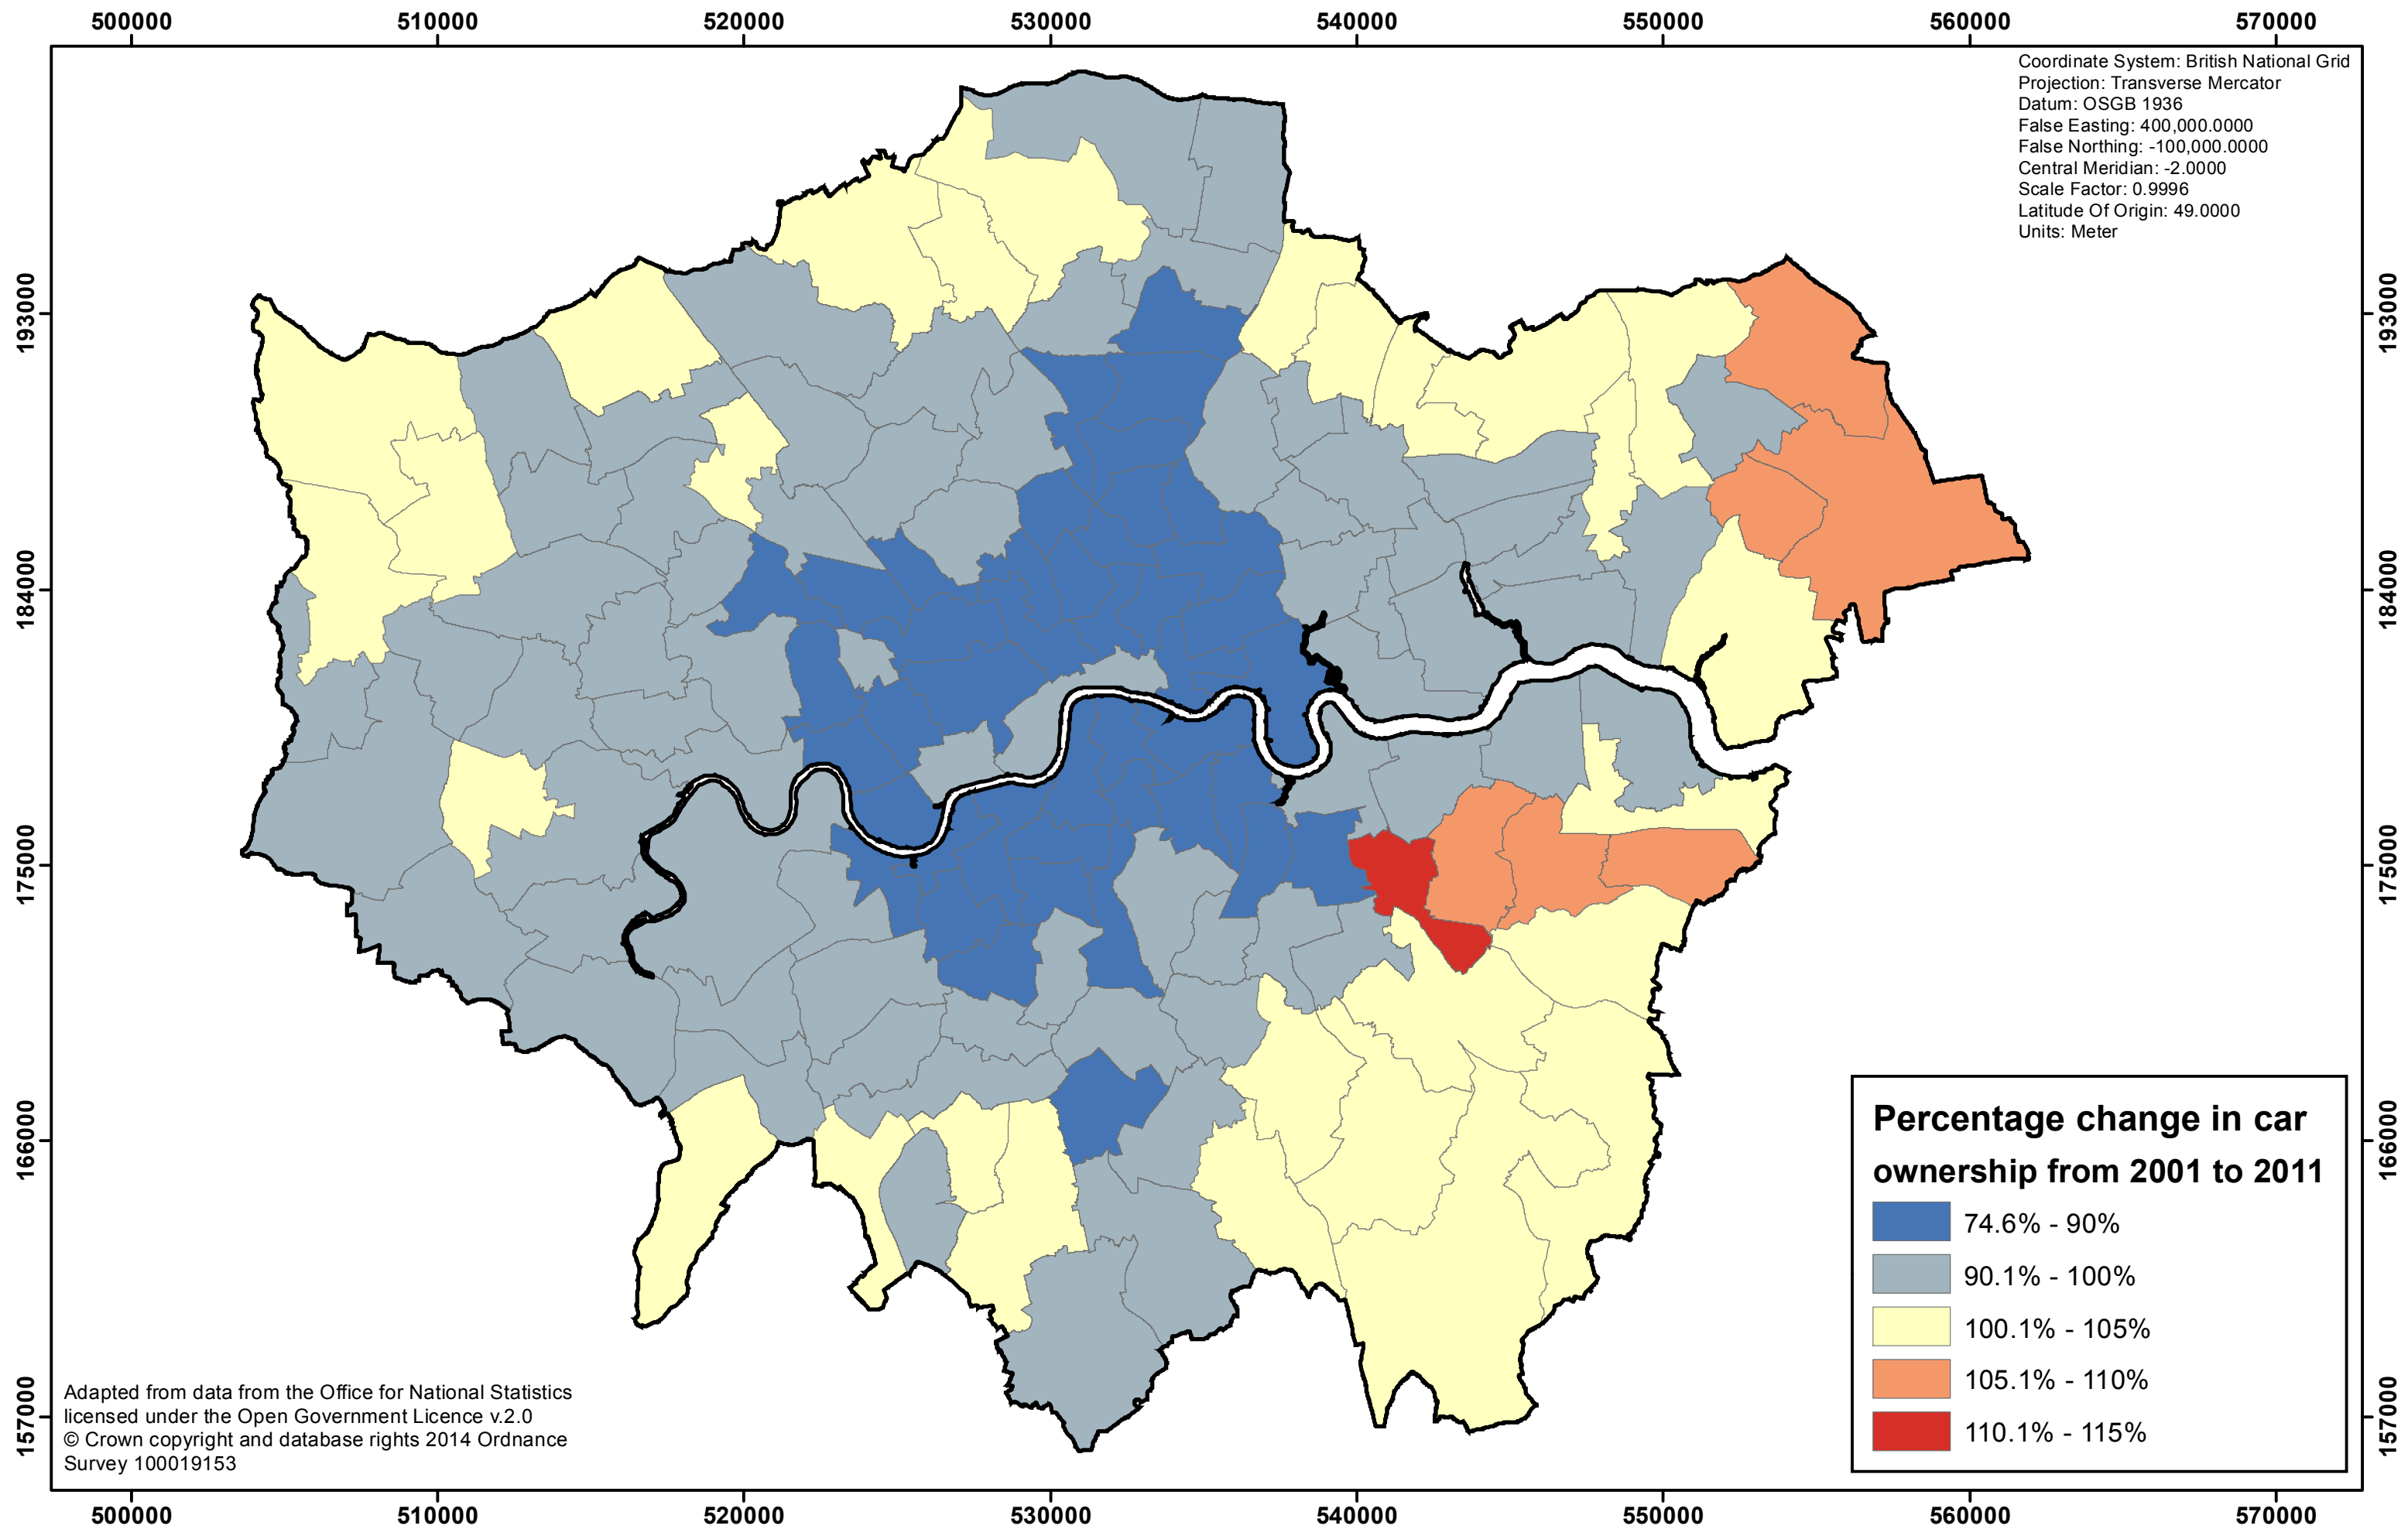

Map 6 : Percentage change in car ownership levels  
in London between the 2001 and 2011 Censuses

**Mapping Car Ownership in Great Britain over Four Decades**  
 Stephen D Clark, School of Geography, University of Leeds, UK, LS2 9JT  
 email : gysc@leeds.ac.uk tel : +44 113 3436707 © Journal of Maps, 2014
